# Supplementary material for: Unveiling a Listeria monocytogenes Outbreak in a Rabbit Farm: Clinical Manifestation, Antimicrobial Resistance, Genomic Insights and Environmental Investigation
Source: MDPI journal article supplement (doi:10.3390/microorganisms12040785), 2024-04-12
Supplement: s1 [file s1]

Supplementary materials

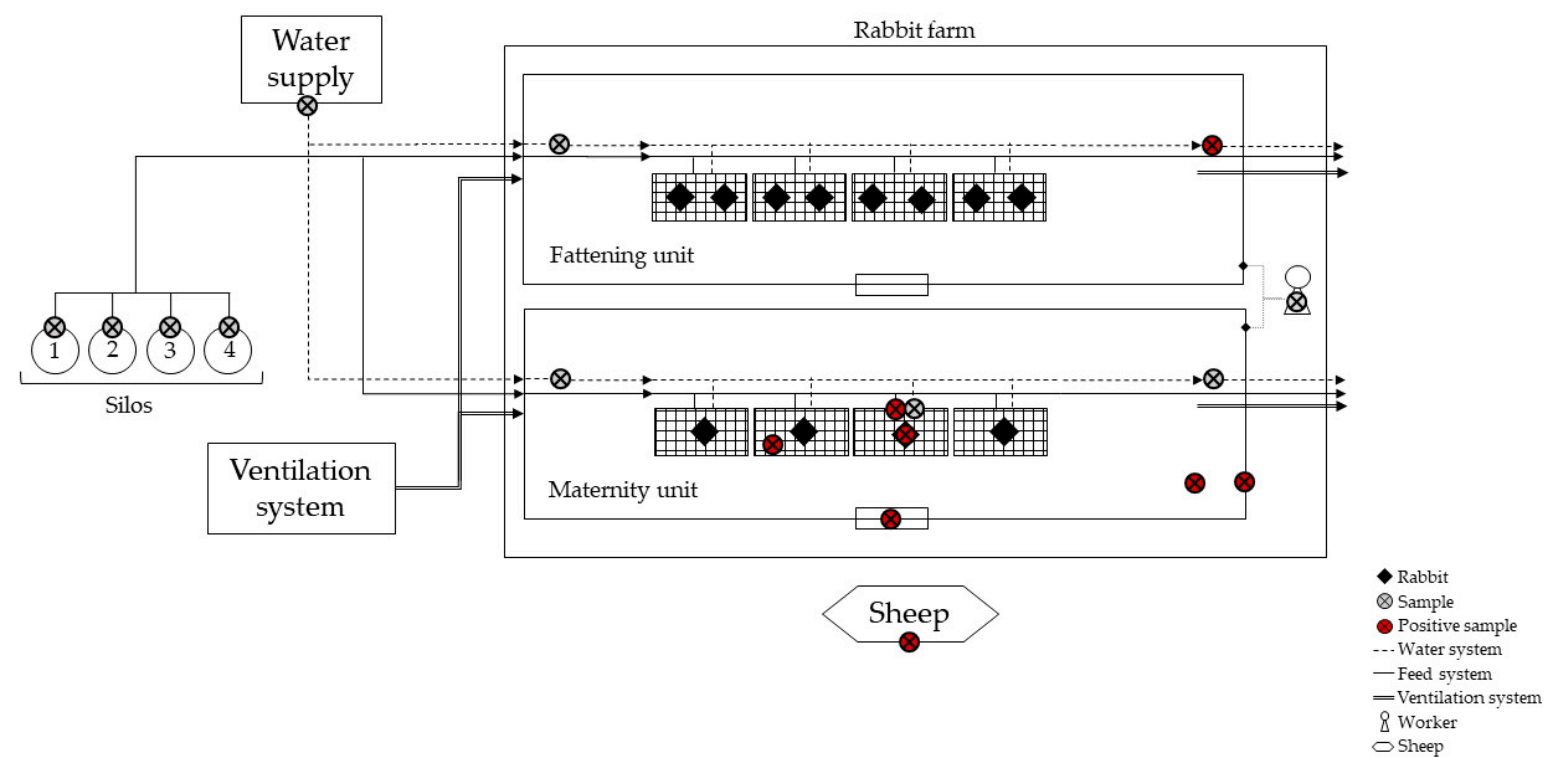

Figure S1 Schematic diagram of positive samples in the rabbit farm.

**Table S1.** Accession numbers of the genomic sequences for each *Listeria monocytogenes* strain.

| <b>SAMPLE</b> | <b>EnaProjectId</b> | <b>EnaSampleId</b> | <b>EnaExperimentId</b> | <b>EnaRunId</b> |
|---------------|---------------------|--------------------|------------------------|-----------------|
| 3594C/1       | PRJEB31216          | ERS18389171        | ERX12096777            | ERR12722210     |
| 3593C/5       | PRJEB31216          | ERS18389172        | ERX12096778            | ERR12722214     |
| 3597F/2       | PRJEB31216          | ERS18389173        | ERX12096779            | ERR12722219     |
| 3596C/2       | PRJEB31216          | ERS18389174        | ERX12096780            | ERR12722223     |
| 3593C/1       | PRJEB31216          | ERS18389175        | ERX12096781            | ERR12722215     |
| 3592C/2       | PRJEB31216          | ERS18389176        | ERX12096782            | ERR12722212     |
| 3592C/1       | PRJEB31216          | ERS18389177        | ERX12096783            | ERR12722207     |
| 3591C/2       | PRJEB31216          | ERS18389178        | ERX12096784            | ERR12722206     |
| 3591C/1       | PRJEB31216          | ERS18389179        | ERX12096785            | ERR12722217     |
| 3590F/2       | PRJEB31216          | ERS18389180        | ERX12096786            | ERR12722222     |
| 3581C/3       | PRJEB31216          | ERS18389181        | ERX12096787            | ERR12722209     |
| 3589C/1       | PRJEB31216          | ERS18389182        | ERX12096788            | ERR12722208     |
| 3584F/2       | PRJEB31216          | ERS18389183        | ERX12096789            | ERR12722216     |
| 3580C/1       | PRJEB31216          | ERS18389184        | ERX12096790            | ERR12722224     |
| 3577C/1       | PRJEB31216          | ERS18389185        | ERX12096791            | ERR12722221     |
| 3576F/1       | PRJEB31216          | ERS18389186        | ERX12096792            | ERR12722211     |
